# Supplementary material
Source: Elsevier journal article supplement (https://www.sciencedirect.com/science/article/pii/S0025775321005121)

### Supplementary Material 3: Bland-Altman plot for every insight dimension of the PWS Adapted Scale.

Dimension 1: Awareness of the medical disease (Prader-Willi Syndrome)

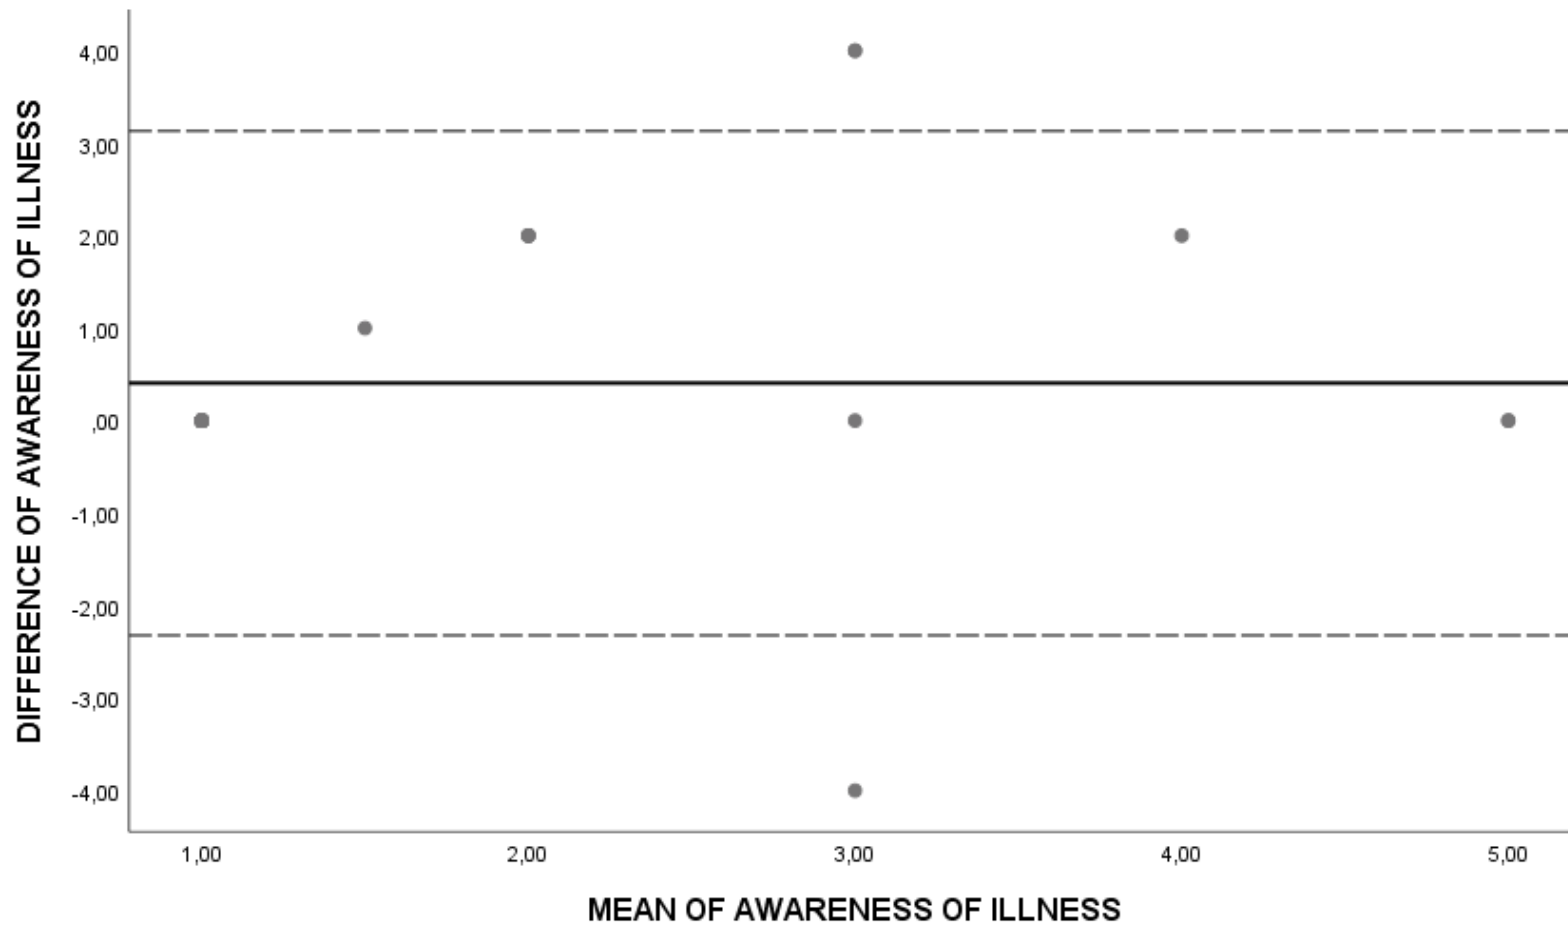

Dimension 2: Awareness of the effect of the psychopharmacological treatment (if there was any)

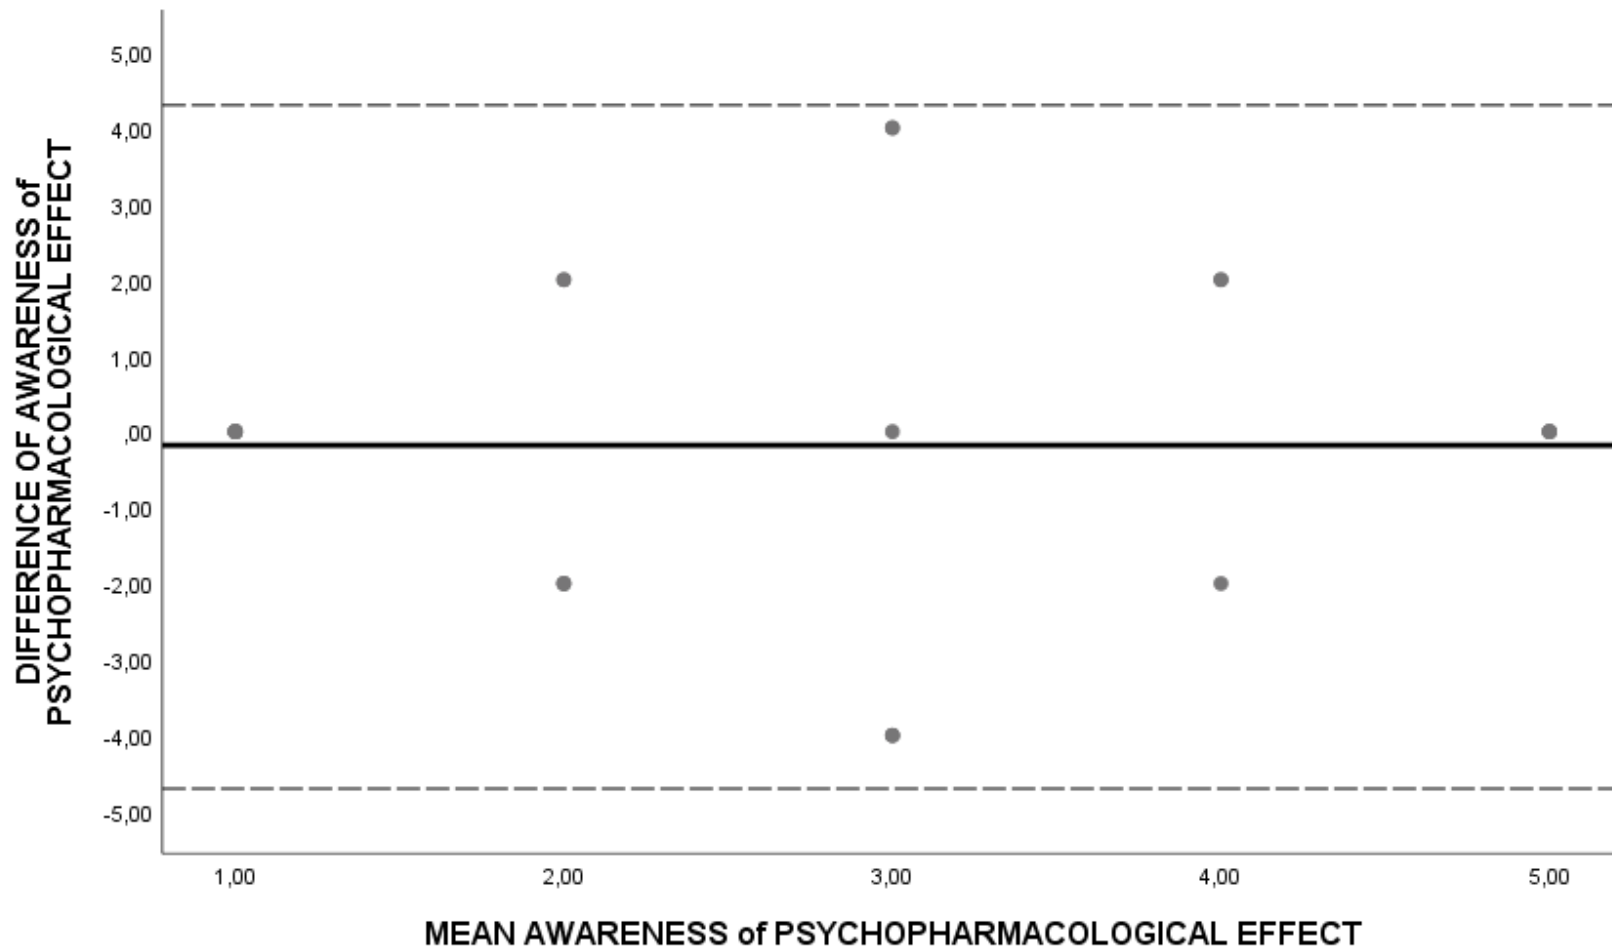

### Dimension 3: Awareness of the Social Consequences of the disease (Prader-Willi Syndrome)

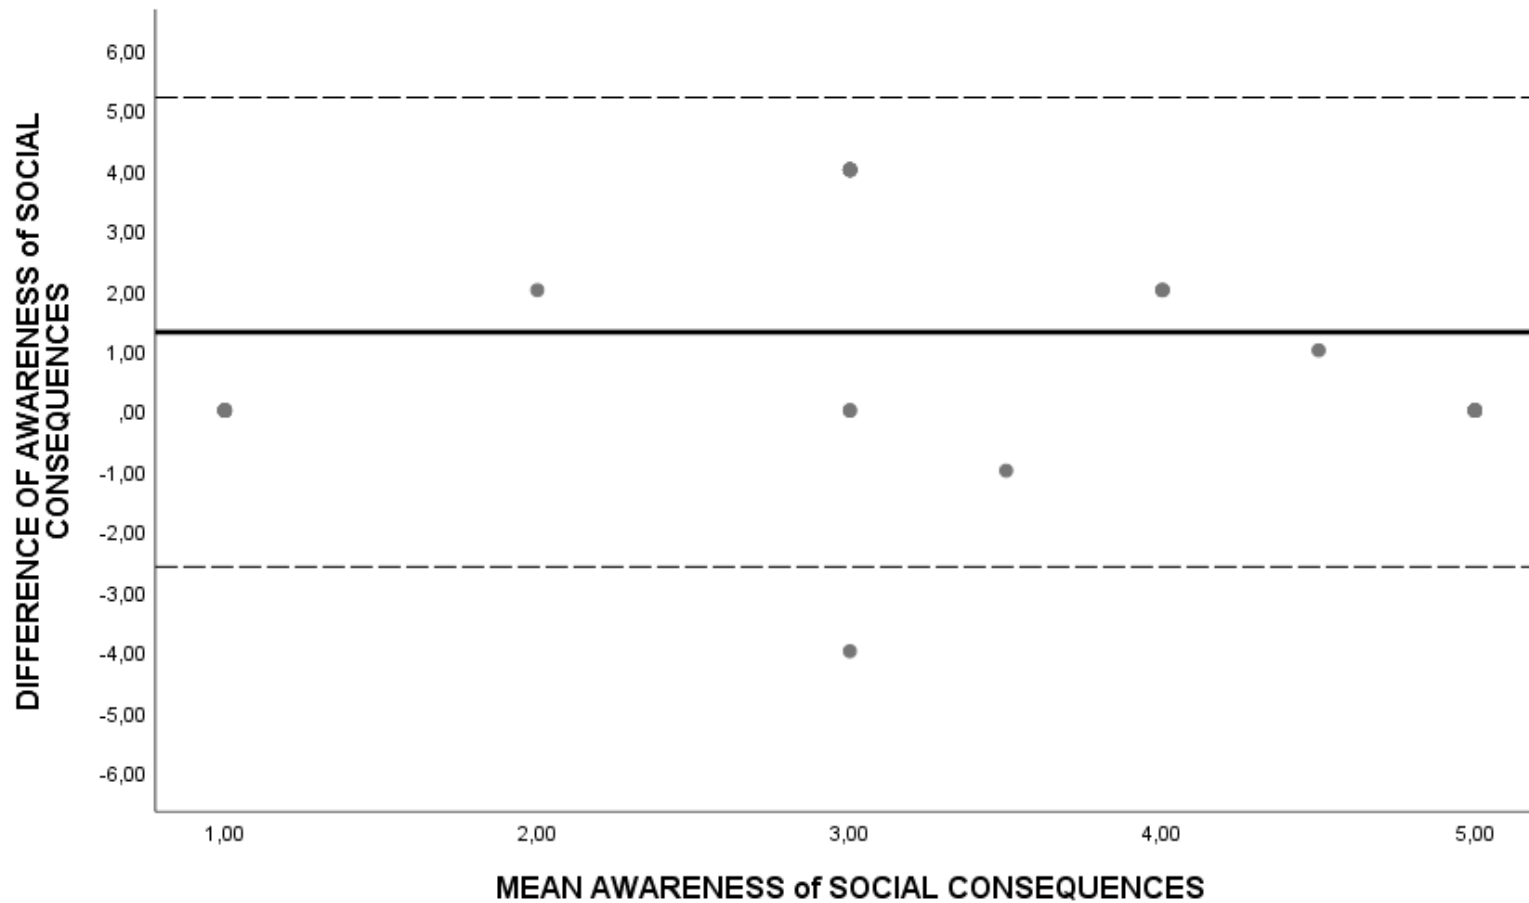

#### Dimension 4: Awareness of the Obesity / Overweight (if it was present)

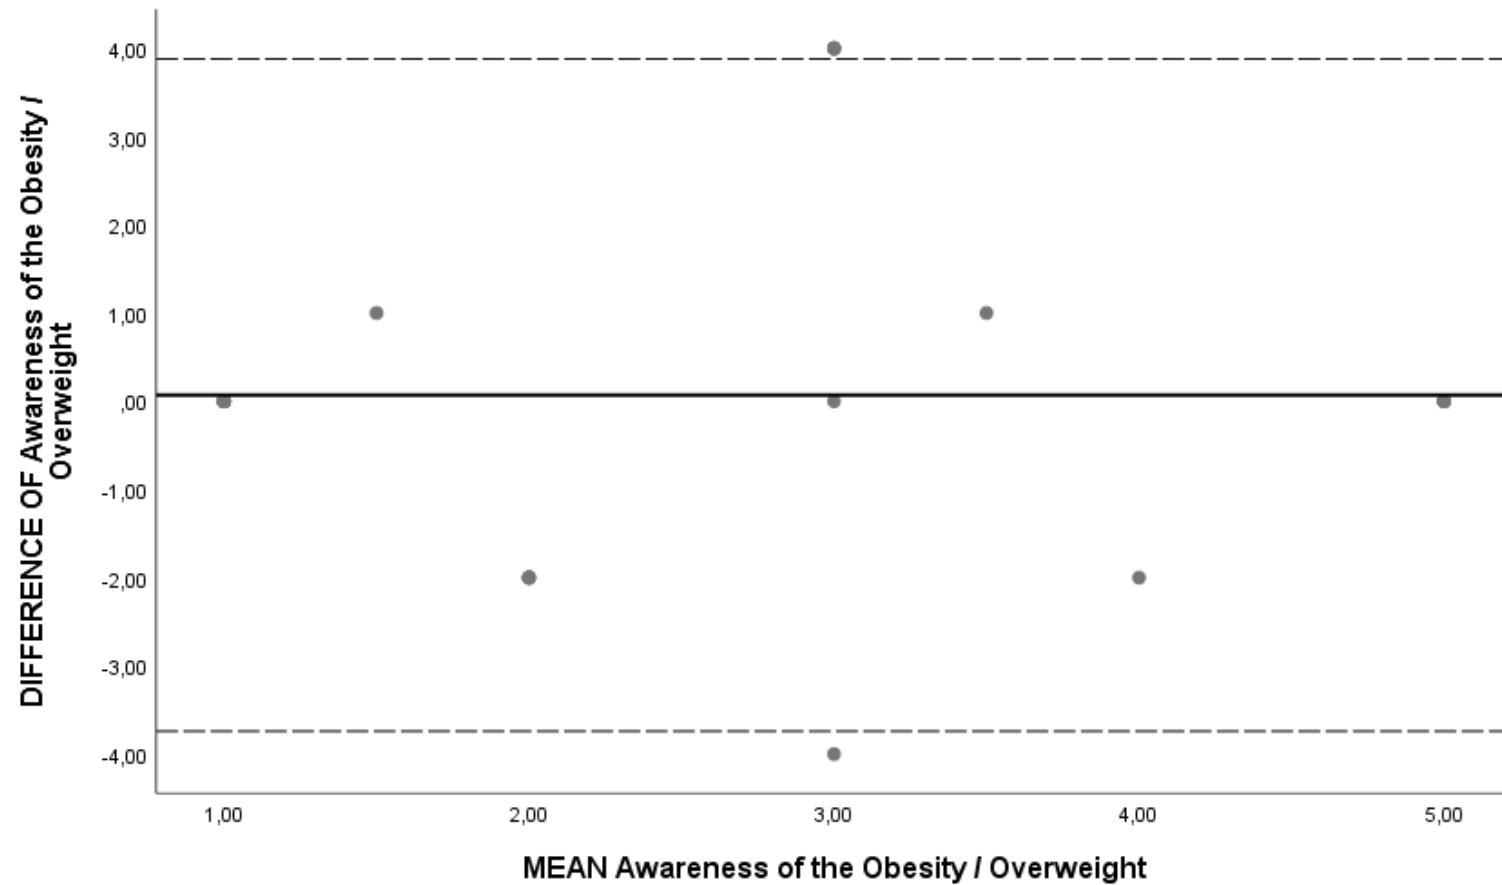

Dimension 5: Awareness of Increased Food Appetite (if there was any)

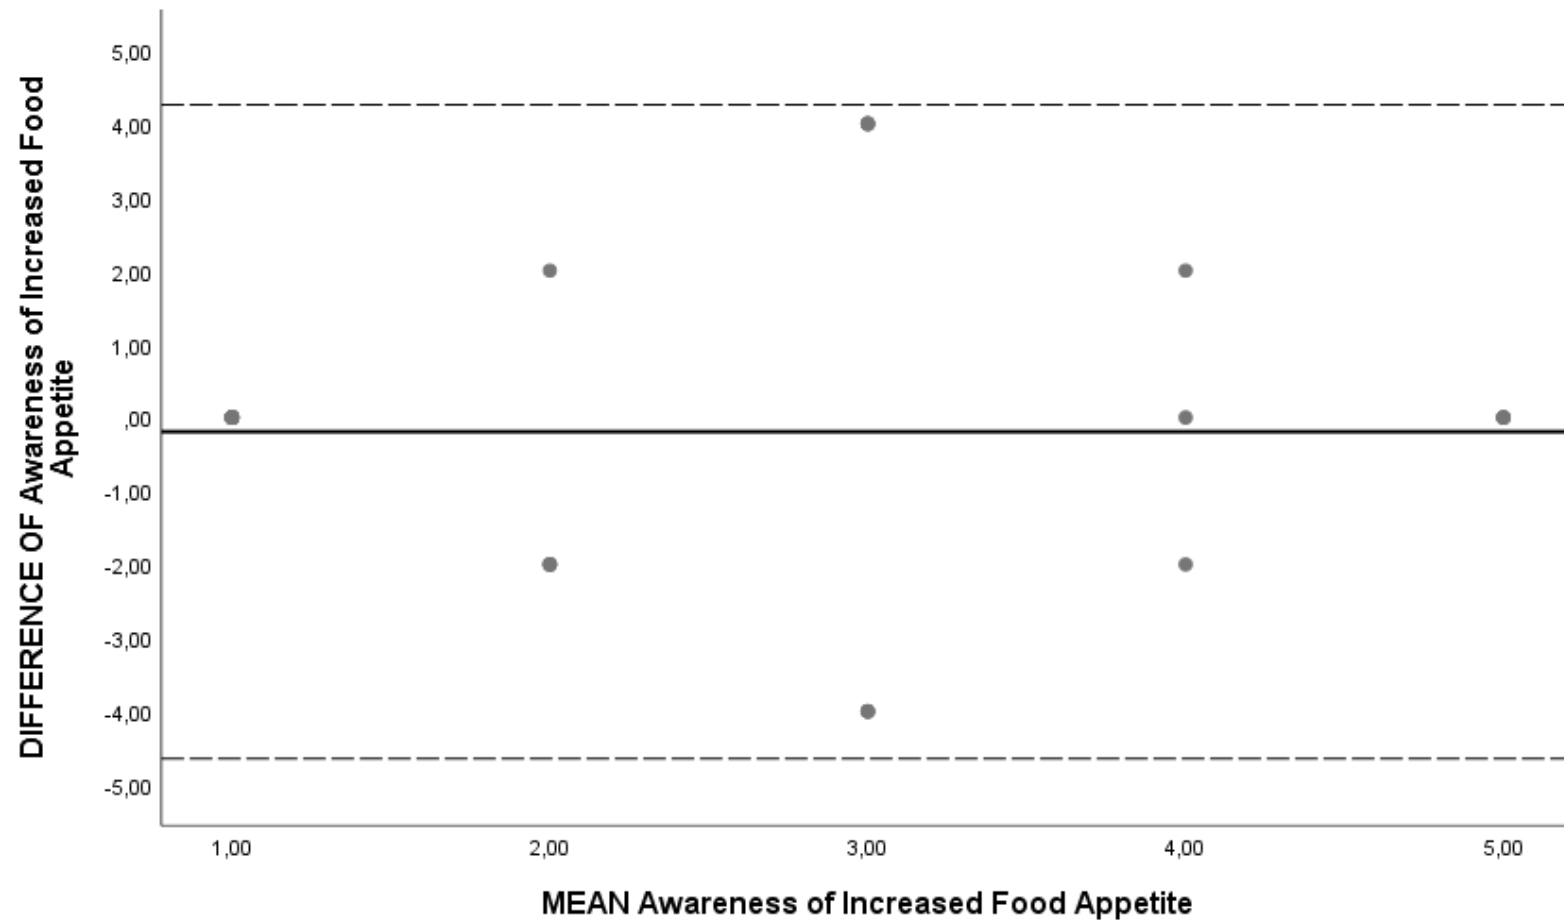

Dimension 6: Awareness of the Increased amount of food eaten (if applicable)

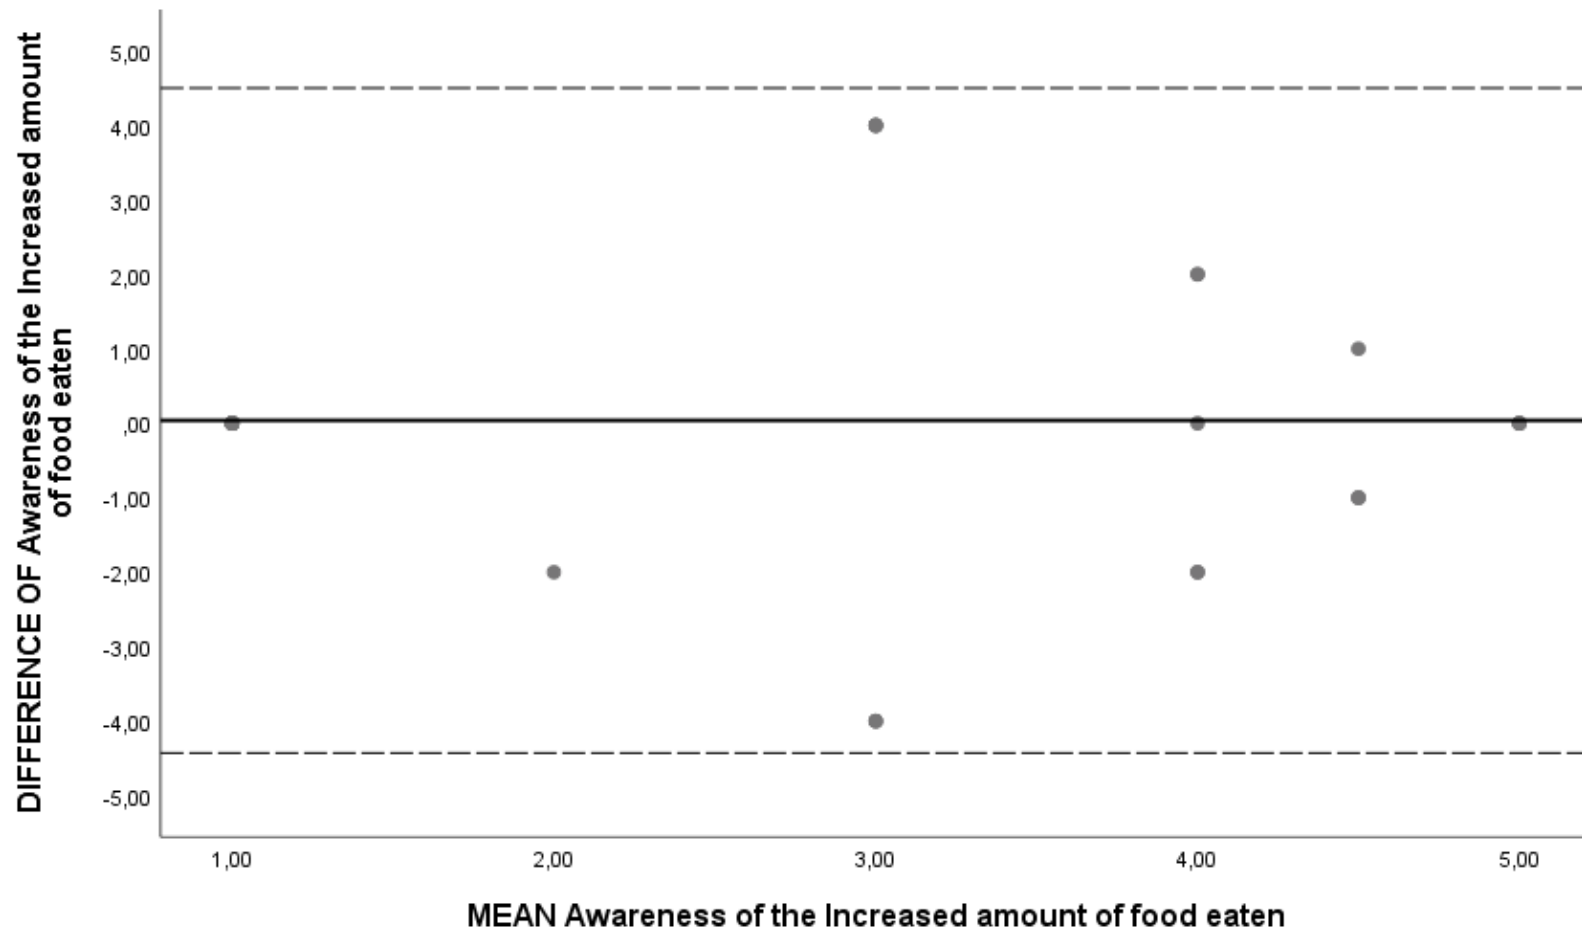

Supplement: mmc3 [file S0025775321005121:mmc3.pdf]
